# Supplementary material for: Preparation of highly porous carbon from sustainable α-cellulose for superior removal performance of tetracycline and sulfamethazine from water
Source: Royal Society of Chemistry journal article supplement (doi:10.1039/c6ra00277c), 2016-01-01
Supplement: c6ra00277c1.pdf [file c6ra00277c1.pdf]

## Supplementary information

### **Preparation of highly porous carbon from sustainable $\alpha$ -cellulose for superior performance removal of tetracycline and sulfamethazine from water**

Jinsong He <sup>a</sup>, Jiangdong Dai <sup>a</sup>, Tao Zhang <sup>a</sup>, Jun Sun <sup>a</sup>, Atian Xie <sup>a</sup>, Sujun Tian <sup>a</sup>, Yongsheng Yan <sup>a,b,\*</sup>,  
Pengwei Huo <sup>a,\*</sup>

<sup>a</sup> School of Chemistry and Chemical Engineering, Jiangsu University, Zhenjiang 212013, China

<sup>b</sup> Key Laboratory of Preparation and Applications of Environmental Friendly Materials (Ministry of Education), Jilin Normal University, Siping 136000, China

Corresponding author. Tel.: +86-0511-88790683; fax: +86-0511-88791800.

E-mail: yys@mail.ujs.edu.cn (Y. Yan)

huopw@mail.ujs.edu.cn (P. Huo)

Table S1 Summary of Sorbate Properties.

| Compounds | Chemical formula                                                | Molecular weight | $S_w^a$<br>(mmol L <sup>-1</sup> ) | $\log K_{ow}^b$<br>(L L <sup>-1</sup> ) | pKa                 |
|-----------|-----------------------------------------------------------------|------------------|------------------------------------|-----------------------------------------|---------------------|
| TC        | C <sub>22</sub> H <sub>24</sub> N <sub>2</sub> O <sub>8</sub>   | 444.43           | 3.8 <sup>1</sup>                   | -1.19 <sup>1</sup>                      | 3.3(1)              |
|           |                                                                 |                  |                                    |                                         | 7.7(2)              |
|           |                                                                 |                  |                                    |                                         | 9.7(3) <sup>1</sup> |
| SMZ       | C <sub>12</sub> H <sub>14</sub> N <sub>4</sub> O <sub>2</sub> S | 278.33           | 1.46 <sup>2</sup>                  | 0.89 <sup>2</sup>                       | 2.3(1)              |
|           |                                                                 |                  |                                    |                                         | 7.5(2) <sup>2</sup> |

<sup>a</sup>  $S_w$  - Water Solubility (25 °C);

<sup>b</sup>  $K_{ow}$  - octanol–water partition coefficient.

<sup>1</sup> J Tolls. Environ. Sci. Technol.35 (2001) 3397-3406.

<sup>2</sup> L Warisara, O Say Kee, T Moorman. Chemosphere 76 (2009) 558-564.

Table S2 Characteristics of  $\alpha$ -cellulose, C $\alpha$ , C $\alpha$ - $\beta$ - $\gamma$ .

| Samples                           | Elemental composition <sup>a</sup> (%) |       |      | Yield<br>(wt%) | $S_{BET}^b$<br>(m <sup>2</sup> g <sup>-1</sup> ) | $V_P^c$<br>(cm <sup>3</sup> g <sup>-1</sup> ) | $S_{micro}^d$<br>(m <sup>2</sup> g <sup>-1</sup> ) | $V_{micro}^e$<br>(cm <sup>3</sup> g <sup>-1</sup> ) | $d_{aver}^f$<br>(nm) |
|-----------------------------------|----------------------------------------|-------|------|----------------|--------------------------------------------------|-----------------------------------------------|----------------------------------------------------|-----------------------------------------------------|----------------------|
|                                   | N                                      | C     | H    |                |                                                  |                                               |                                                    |                                                     |                      |
| <b>C<math>\alpha</math></b>       | 0.87                                   | 60.03 | 1.21 | 47.22          | 26.14                                            | 0.042                                         | 1.92                                               | 0.002                                               | 2.769                |
| <b>C<math>\alpha</math>-850-0</b> | 0.51                                   | 89.12 | 0.75 | 59.61          | 56.34                                            | 0.061                                         | 12.01                                              | 0.013                                               | 1.688                |
| <b>C<math>\alpha</math>-850-4</b> | 0.41                                   | 89.77 | 0.76 | 11.41          | 3187.91                                          | 1.781                                         | 2655.35                                            | 1.407                                               | 1.628                |

<sup>a</sup>: Determined by Vario Micro cube element analyzer.

<sup>b</sup>: BET specific surface area calculated in the relative pressure region  $P/P_o = 0.05 - 0.35$ .

<sup>c</sup>: Total pore volume which is determined at  $P/P_o = 1.0000$ .

<sup>d</sup>: Micropore surface area calculated by the t-plot method.

<sup>e</sup>: Micropore volume calculated by the t-plot method.

<sup>f</sup>: Average pore diameter obtained from DFT equation using N<sub>2</sub> isotherms.

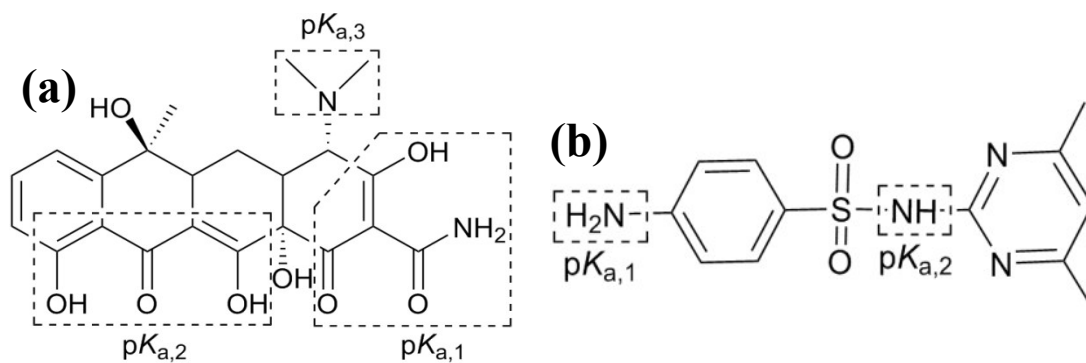

Fig. S1 Chemical structures of tetracycline and sulfamethazine. The regions framed by dashed lines represent the structural moieties associated with the acidic dissociation constants ( $pK_a$ ).

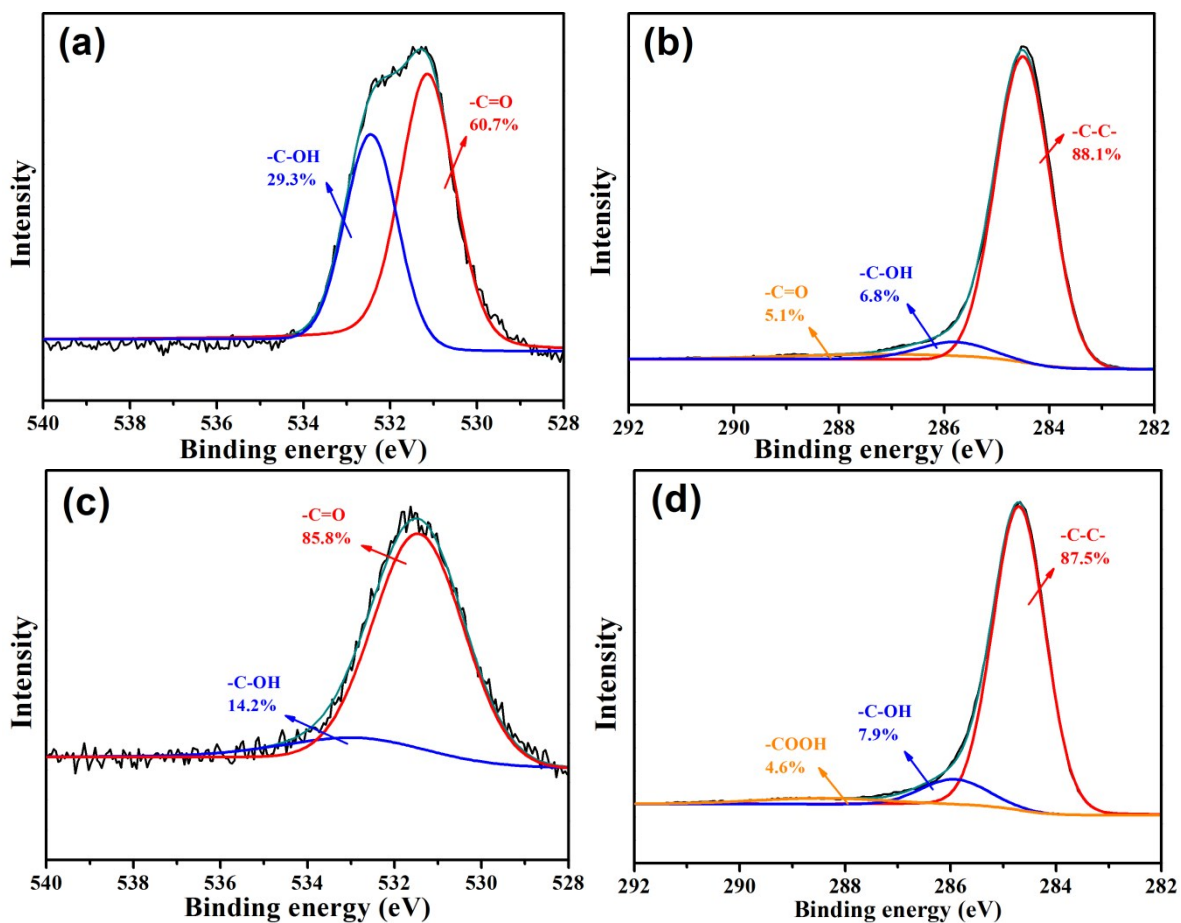

Fig. S2 High-resolution XPS spectra of (a) O1s and (b) C1s peaks of Cα-850-4.
